# Supplementary material
Source: publisher site journal article supplement (https://www.dovepress.com/article/325529)
Supplement: Supplementary file 1 [file get_supplementary_file.php]

**Supplementary file (S1)**

**Part 1. Demographic Data**

**Age:**

- 18-30
- 31-40
- 41-50
- 51-60
- >60

# Gender

- 1. Male ▢ 2. Female

**Place of residence**

- Rural
- Urban

# Level of education

- 1. Un-educated
- 2. Secondary/ Matriculation
- 3. Intermediate/FA/FSC
- 4. University
- 5. Higher education

# Occupation:

# Employed

# Unemployed

# Housewife

# Students

**Family income per month (According to monthly salary)**

- Less than Rs. 22,000 per month
- Rs 22,000 to Rs 3.5 lakhs
- More than Rs 3.5 lakhs

# Do you have any chronic illnesses?

1. DM
2. Obesity
3. Thyroid Disorders
4. Bronchial Asthma
5. Cardiac illnesses
6. Hypertension
7. Chronic respiratory illnesses
8. Malignancy
9. Other: (… )
10. None

**Part II: Information about contracting COVID-19 during current pandemic**

1. **Did you have covid-19 during this pandemic?**
2. Yes
3. No
4. **Did anyone in your contacts suffer from covid-19 during this pandemic?**
5. Yes
6. No

**Part III: Source of information about COVID-19 vaccination**

# 1. Do you trust information given to you by ministry of health?

1. Yes 2. No

**2. Do you trust the information given by your physicians?**

1. Yes 2. No

3. **Do you trust the information given by social media?**

1. Yes 2. No

4. **Do you trust the information given by news channels?**

1. Yes 2. No

**Part IV:** **Beliefs toward COVID-19 vaccination**

**5. Do you think that the COVID-19 vaccine is safe?**

1. Yes 2. No 3. Not sure

**6. Do you think that the COVID-19 vaccine is effective?**

1. Yes 2. No 3. Not sure

**7. Do you think that the best way to avoid the complications (hospitalization and death) of COVID-19 is by getting the vaccine?**

1. Yes 2. No 3. Not sure

**8. Do you think that greater public awareness is needed about COVID-19 vaccine?**

1. Yes 2. No 3. Not sure

# 9. When COVID19 vaccine is available, do you Intend to get vaccinated?

1. Yes 2. No

if “Yes”, please stop here. and if “No”, please answer the following questions.

**Part V: Barriers related to COVID-19 vaccination**

**10. Check which statement to show why you do not plan to get COVID-19 vaccine ((only one answer)).**

1. I am concerned about the vaccine’s side effects.
2. I don’t believe that the vaccine will save me from infection.
3. I don’t need the vaccine because I do all the precautions. I wash my hands and wear a mask and gloves.
4. I don’t like needles/syringes.
5. There conspiracy theories about COVID-19 vaccine.
6. I don’t need the vaccine because I’m young and healthy.
7. Other……

**11. On which condition, would you more likely to get the COVID-19 vaccine? ((only one answer))**.

1. If my physician recommends it to me
2. If it is mandatory by for continuing my Job.
3. If it was compulsory by the government (MOH).
4. If my family or friends get vaccinated.
5. If research studies showed that the vaccine is safe and effective.
6. I would not take it under any condition.
7. If there is a mode other than injection like oral vaccine.
8. Other……..

**Thank you for participating in our survey.**

**Note:** Adapted from Magadmi, R.M., Kamel, F.O. Beliefs and barriers associated with COVID-19 vaccination among the general population in Saudi Arabia. BMC Public Health 21, 1438 (2021). https://doi.org/10.1186/s12889-021-11501-5.23
